# Supplementary material
Source: ML conference proceedings conference paper supplement (https://openreview.net/forum?id=5ai2YFAXV7)

-- Threshold under which individual edges are not significant

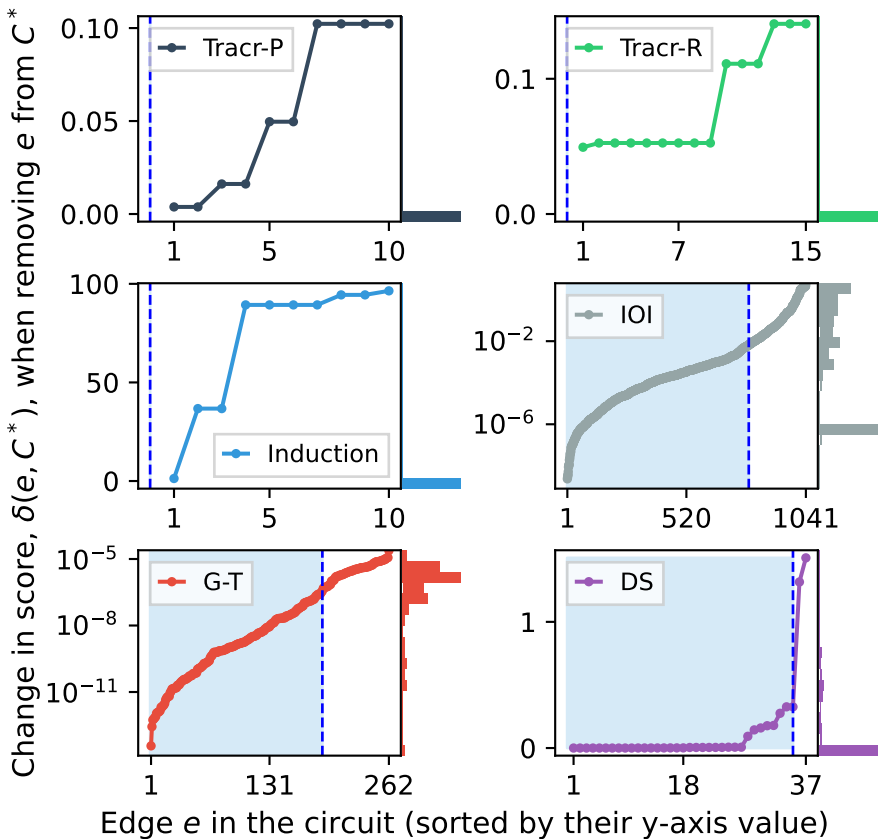

Supplement: supplementary_material [file attachment]

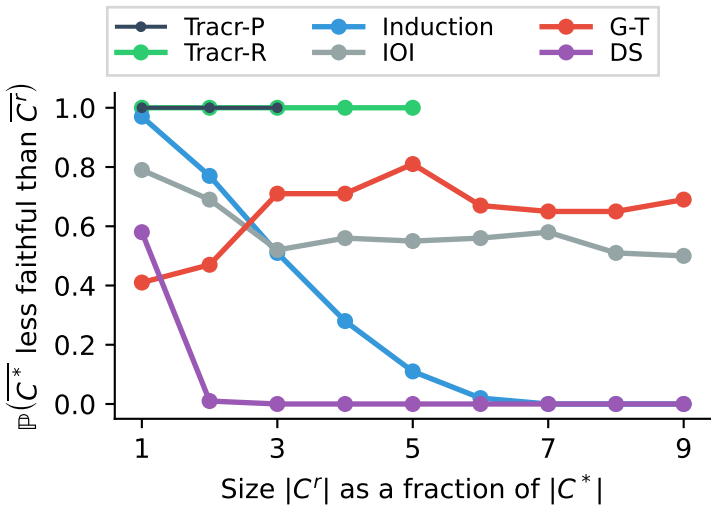

Supplement: supplementary_material [file attachment]

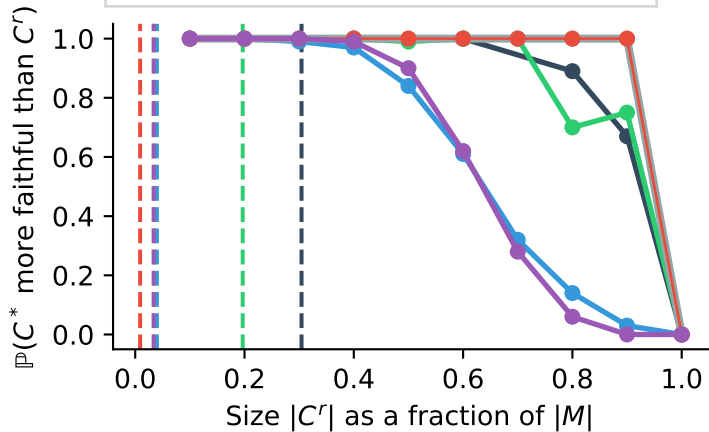

Supplement: supplementary_material [file attachment]
